# Supplementary material for: High-Throughput Chemical Screen Identifies a Novel Potent Modulator of Cellular Circadian Rhythms and Reveals CKIα as a Clock Regulatory Kinase
Source: PubMed Central journal article supplement (PMC3001897; doi:10.1371/journal.pbio.1000559), 2010-12-14

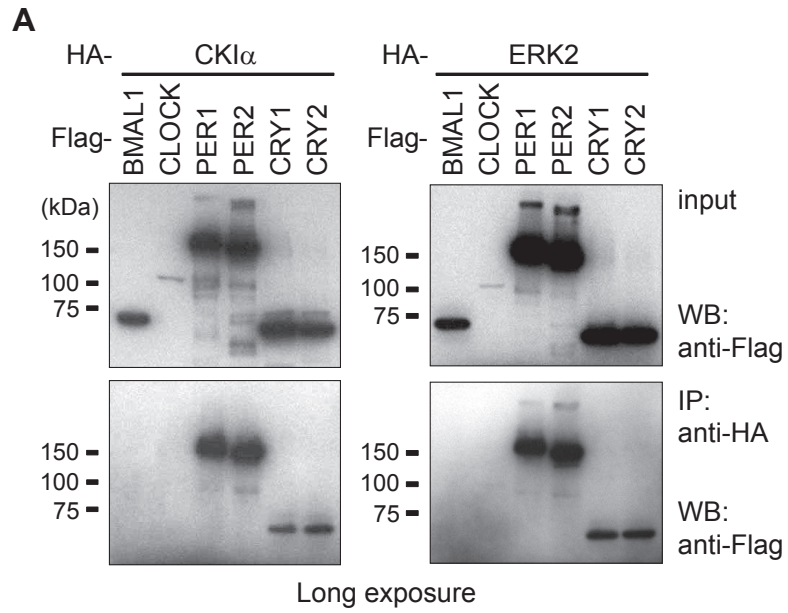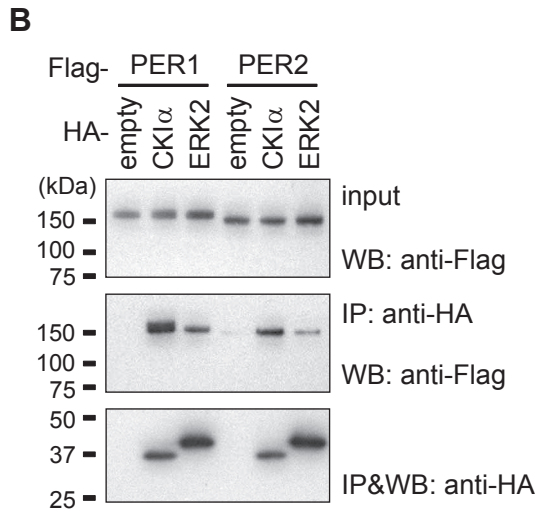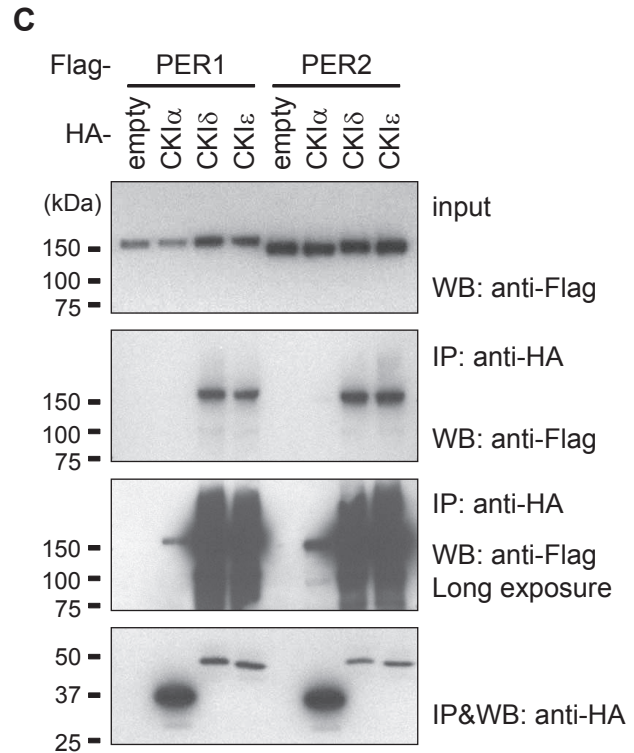

Supplement: pbio.1000559.s006.pdf [file pbio.1000559.s006.pdf]
